# Supplementary material for: The Gut Microbiota in Camellia Weevils Are Influenced by Plant Secondary Metabolites and Contribute to Saponin Degradation
Source: PubMed Central journal article supplement (PMC7380582; doi:10.1128/msystems.00692-19), 2020-03-17

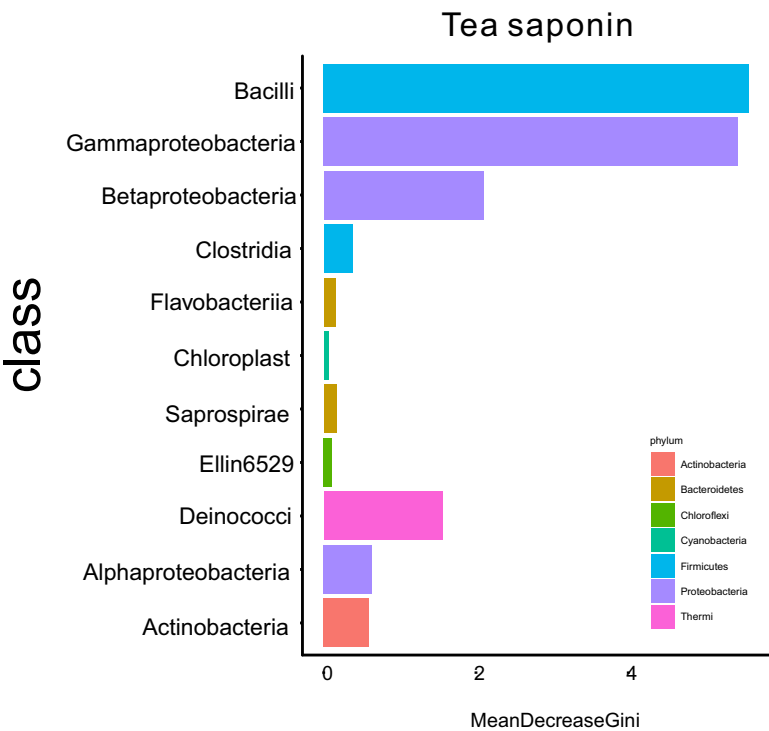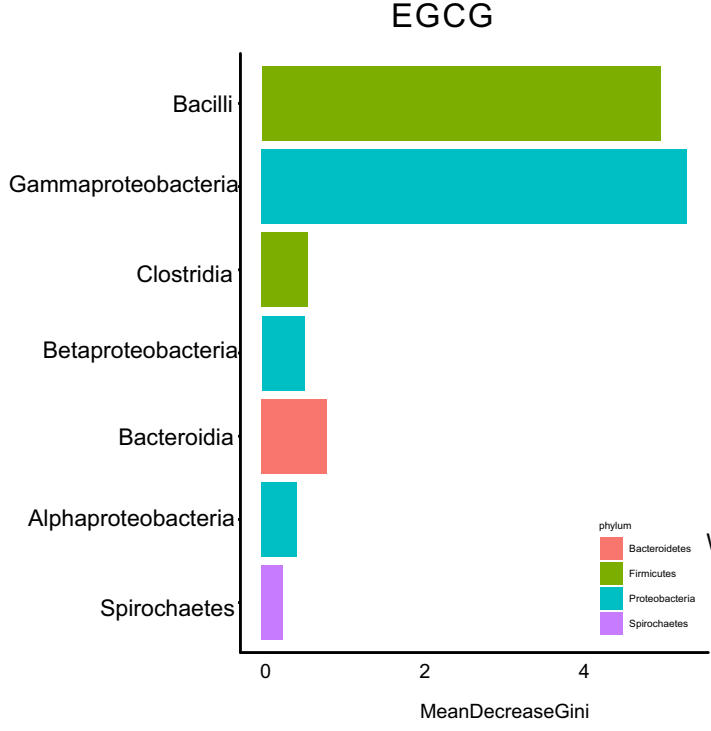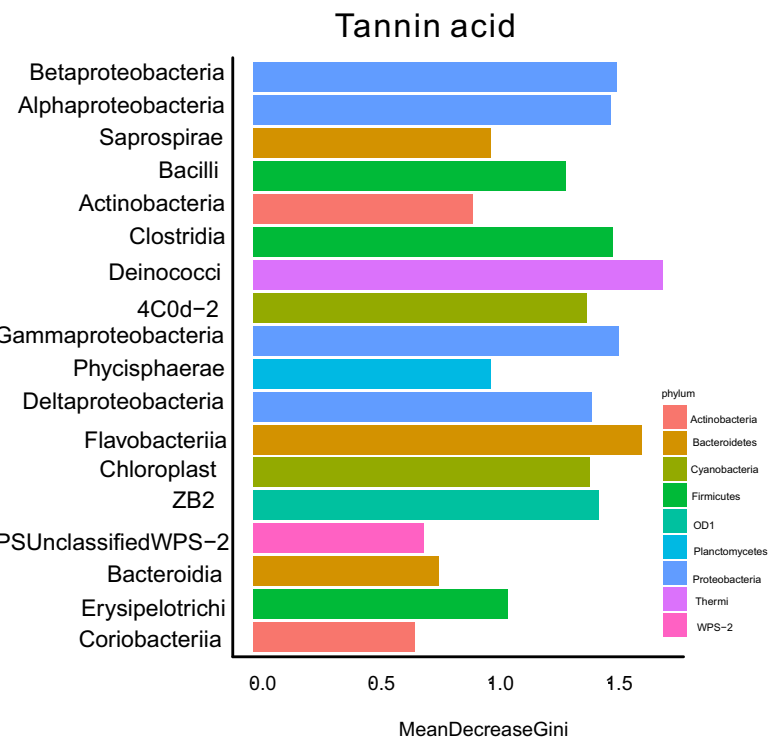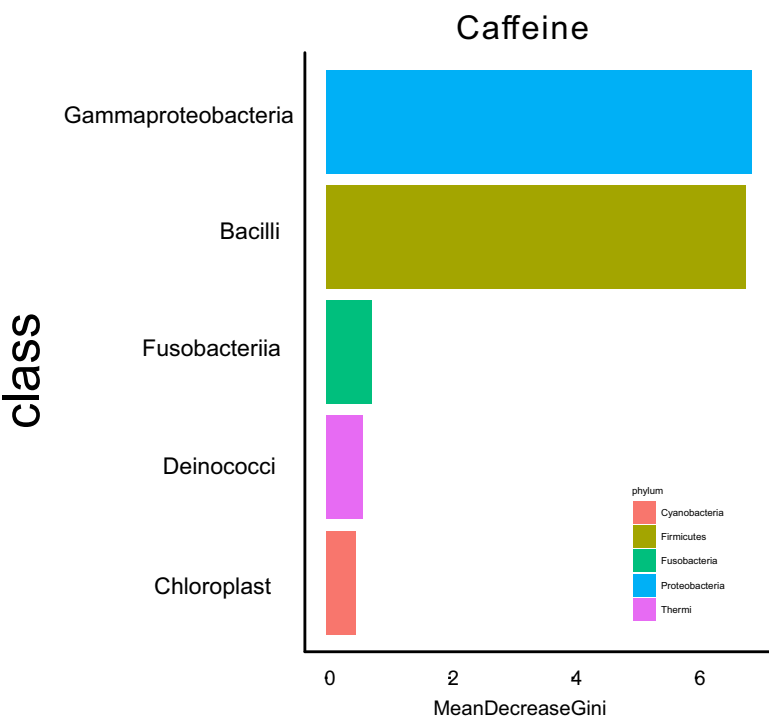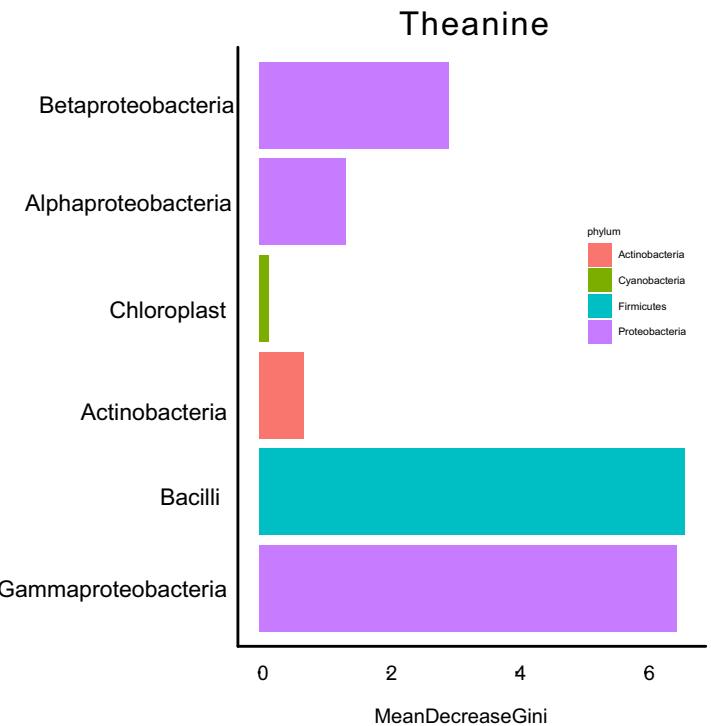

Supplement: mSystems.00692-19-sf002.pdf [file mSystems.00692-19-sf002.pdf]
